# Supplementary material for: Carbon coated manganese monoxide octahedron negative-electrode for lithium-ion batteries with enhanced performance
Source: Royal Society of Chemistry journal article supplement (doi:10.1039/c5ra00830a), 2015-01-01
Supplement: c5ra00830a1.pdf [file c5ra00830a1.pdf]

## Supporting Information for

# Carbon Coated Manganese Monoxide Octahedrons Negative-electrode for Lithium-ion Batteries with Enhanced Performances

Huili Cao,<sup>a</sup> Xinzhen Wang,<sup>a</sup> Hongbo Gu,<sup>b</sup> Jiurong Liu,<sup>\*a</sup>  
Liqiang Luan,<sup>c</sup> Wei Liu,<sup>\*c</sup> Yiran Wang,<sup>d</sup> and Zhanhu Guo.<sup>\*d</sup>

<sup>a</sup>Key Laboratory for Liquid–Solid Structural Evolution and Processing of Materials, Ministry of Education and School of Materials Science and Engineering, Shandong University, Jinan, Shandong 250061, China

<sup>b</sup>Department of Chemistry, Tongji University, Shanghai, 200092, China

<sup>c</sup>State Key Laboratory of Crystal Materials, Shandong University, Jinan 250100, China

<sup>d</sup>Integrated Composites Lab (ICL), Department of Chemical and Biomolecular Engineering, University of Tennessee, Knoxville, TN 37996 USA

\*Corresponding author: E-mail: [jrliu@sdu.edu.cn](mailto:jrliu@sdu.edu.cn); Tel.: +86-531-88390236

[zguo10@utk.edu](mailto:zguo10@utk.edu); Tel: +1-865- 974-2933

**This file includes:**

- XRD pattern of the as-prepared  $\text{Mn}_3\text{O}_4$  octahedrons.
- SEM images of the  $\text{Mn}_3\text{O}_4$  octahedrons prepared with 0.5 g PVP addition at 150 °C over a reaction time of **(a)** 30, **(b)** 45, **(c)** 60, and **(d)** 90 min.
- SEM images of the  $\text{Mn}_3\text{O}_4$  octahedrons prepared **(a)** without PVP, and with the addition of **(b)** 0.2, **(c)** 1.0 and **(d)** 1.5 g.
- TEM image of as prepared  $\text{MnO}@C$  octahedrons.

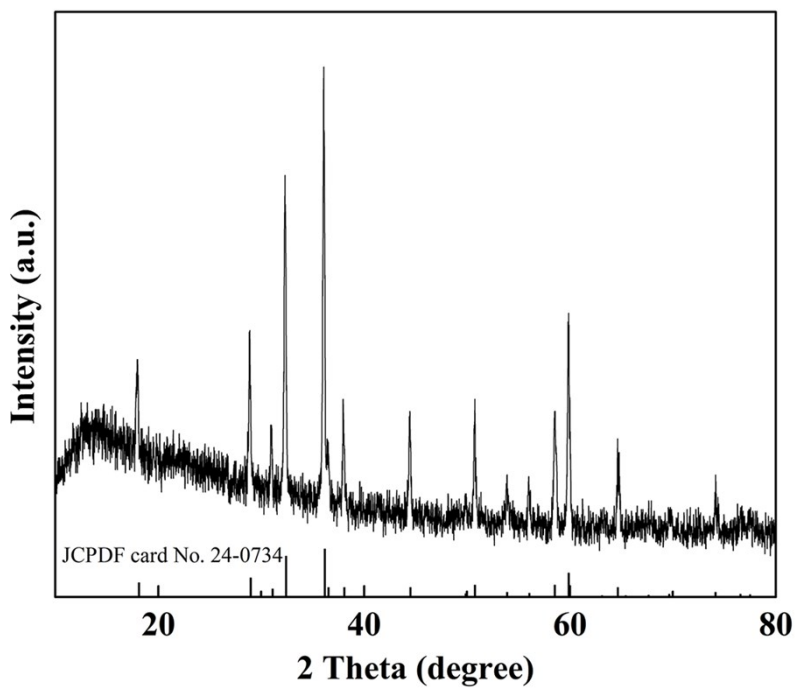

**Figure S1.** XRD pattern of the as prepared  $\text{Mn}_3\text{O}_4$  octahedrons.

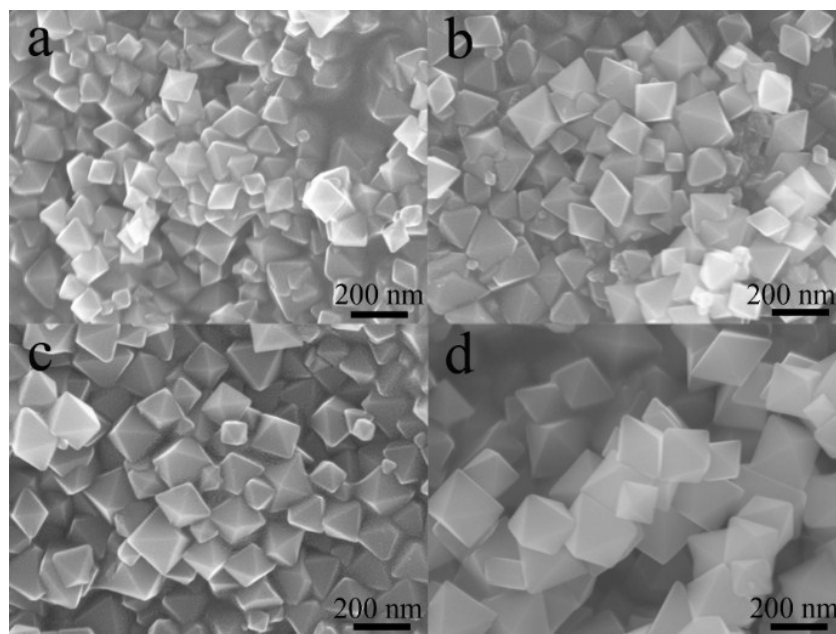

**Figure S2.** SEM images of the  $\text{Mn}_3\text{O}_4$  octahedrons prepared with 0.5 g PVP addition at 150 °C over a reaction time of (a) 30, (b) 45, (c) 60, and (d) 90 min.

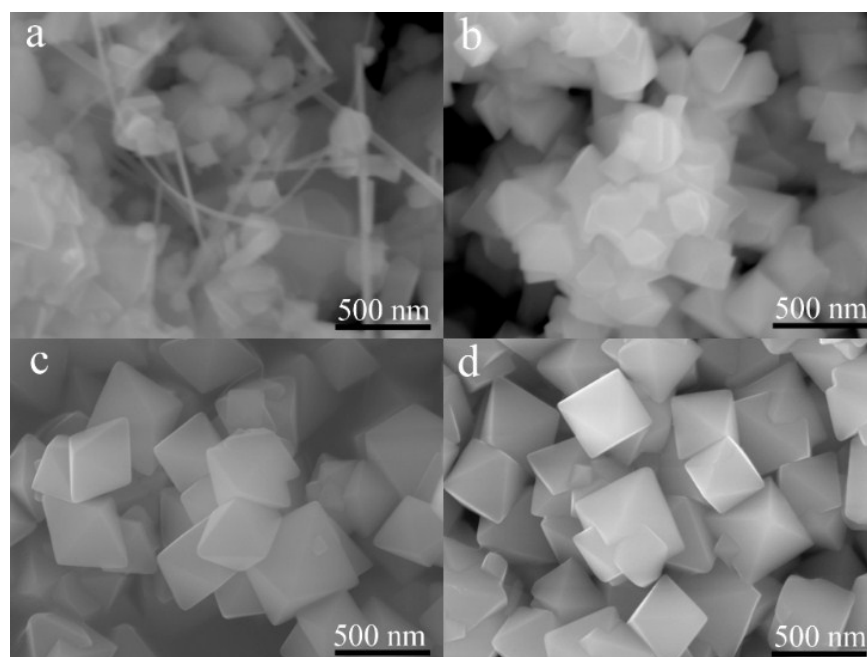

**Figure S3.** SEM images of the  $\text{Mn}_3\text{O}_4$  octahedrons prepared (a) without PVP, and with the addition of (b) 0.2, (c) 1.0 and (d) 1.5 g.

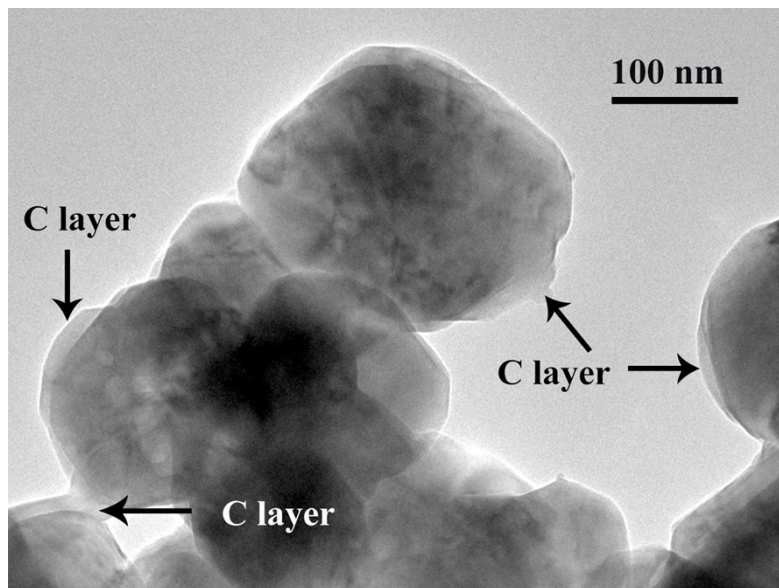

**Figure S4.** TEM image of as-prepared MnO@C octahedrons.
